# Supplementary material
Source: Research Square preprint supplement (doi:10.21203/rs.3.rs-9247037/v1)
Supplement: Supplementary file 1 [file dfcd5b70d2448330cb6251af.docx]

**RESULTS TABLE**

| **No.** | **Questions** | **Districts** | **Name** | **Answer** | **Keywords** |
| --- | --- | --- | --- | --- | --- |
| 1. | What makes you happy? | Mango | Hj.A (I1) | Alhamdulillah, talking happily is where we can be useful, fun and give knowledge, especially to our families, neighbors and the surrounding environment and even more so we are happy if we can be useful and useful and provide knowledge to the entire community. That is what makes me happy and happy if I am useful to them, especially to the elderly. The elderly school has been in the school for 2 years and I am the principal. And the activity is once a month, and usually there are also 1-2 meetings if there are speakers who want to fill in. The more skills given to the elderly, the better. And on this occasion, what can be given skill material is the serving hood that is taught. Initially, I happened to be a family planning cadre, so indeed the family planning cadre had a foster family for the elderly. At that time, I happened to think and see the conditions where I lived, there were many elderly and productive people. Why do I say productive because I see that there are tailors, crafts, some who sell but there are also elderly people who do not have activities so I see many elderly people in my RW and I propose how to form BKL (Elderly Family Development) at that time it does not seem to exist or already exists but is not active so finally I am in RW 5 then I am a cadre so I recruit or collect the elderly. The first meeting was at the ta'lim assembly in the field of spiritual dimension and I formed and gathered to learn to recite and finally develop and I proposed to form BKL and develop into an elderly school | 1. Spending time with family : (Hj.A I1), (Hj. A I2), (Hj. AW I3), (JS I4), (W I5), (NS I7), (AS I8), (A I10), (H I13), (SD I12), (B I14), (Hj.SR I16), (H.B I19), (Hj. BS I20), (Hj. H I21), (A I23), (H I24), (A I26), (F I27), (I I28), (J I29), (DN I30), (H.E I31), (R I32), (AA I33), (MK I34), (M I35), (M I36), (S I38), (J I40), (I I41), (R I42). 2. Healthy : (Hj. AW I3), (JS I4), (S I9), (N I15), (Hj. H I21), (F I22), (J I29), (AA I33), (J I40), (I I41). 3. Feeling grateful :(Hj.A I1), (NS I7), (AS I8), (A I10), (K I17), (AR I18), (AS I25). 4. Elderly Schools :(Hj.A I1), (JS I4), (W I5), (SD I12), (H I36), (R I42). 5. Taklim Council Activities: Hj.A I1), (Hj. A I2), (W I5), (JS I4). 6. Sports: (JS I4), (W I5), (Hj. H I21), (F I22), (AA I33), (MK I34). |
| JS (I2) | I am happy because I can embrace the residents around, especially here every night there are patrols with the residents. I also always participate in elderly activities, PKK, taklim councils, and schools for the elderly, both in the village and at the sub-district level, I am always present. Anu, what makes me happy is also because the people here are kind, friendly, and polite. I have lived in Manggala for almost 40 years, from the time I was still an RT until now, and the atmosphere is indeed very friendly. I also routinely check my health every month, so I can still maintain my body condition. I like sports, sometimes I go for a morning walk, play badminton, or ride a bike. At this age I can still play badminton, there is even government land that is handed over to the community, then with mutual cooperation we make it a sports venue together, and until now it is still running. Because the environment is good, even yesterday a people's party was held, all residents came. We also always hold the values of sipakalebbi, sipakatau, sipakainge, so we don't only respect the rich or the poor, but we all value them equally. |  |
| W(I3) | From a social point of view, the elderly are happy because there is a *Sipalopi elderly school*. It is a place where they gather, stay together, share experiences, and be happy with small things like that. In addition, they also get a lot of knowledge, education, new programs, such as cooking skills. So even though he is elderly, he can still hone his talents. They also participate in other activities such as taklim assembly, ngaji, where they feel happy because they are still active, they can still do activities. It's just that if you look at it, the most dominant is indeed the taklim assembly. Because there is religious teaching and social gatherings, so it is more crowded, more enthusiastic to attend. If there is gymnastics, there is also one, but it is not as crowded as the assembly. For recreation, they are also enthusiastic, because there they really let go, play, cook, so it's even more fun |  |
| Squirt | NS (I4) | Gathering with family, having been married for 58 years because always what exists must be grateful. Or the husband, for example, must be faced with an open heart and always surrender to the above |  |
| AS (I5) | First, the term is a lot of gratitude. This means that what we face is calm, ordinary. |  |
| S (I6) | Indirectly, we convey that the elderly need something like this. They are already needed. And they are also limited in their steps. If they are not visited, entertained, performed. If there is sustenance, yes, it should be. His name is parents. What is it brought? Because if we invite them out on the road, they are not very active. Who knows with him too, his grandson played. Maybe they are also happy. Because if you take care of your grandchildren, you play differently. If you take care of your grandchildren, sometimes you have to like it or not. And it is impossible to refuse. |  |
| Tamalanrea | A (I7) | As long as I don't have retirement, I think anyway I just enjoy it. Gather with family.  Living this life casually and not thinking about others, because what is clear is that I live this life calmly and relaxed and always hope for Allah's pleasure and carry out Allah's commands |  |
| AS (I8) | Because you like to walk", mosque worshippers are also here, thank God, gathering families, gathering with neighbors. |  |
| S (I9) | I am happy because I am always healthy, thank God, my children are always healthy, have worked and finally it is almost finished |  |
| Bontoala | H(I10) | For example, gathering with family is the main thing and both of my hobbies are fishing, besides that most of them are gathering with friends and neighbors, joking with friends" if we want to say "each one has its own share" |  |
| R (I11) | I am happy because the person I am with always gives positive thoughts, health and thank God and also my family |  |
| SD (I12) | Happy because I gather with my family and can join the elderly school with friends and neighbors here and always be grateful for what I have |  |
| The End of the Ground | H (I13) | For example, gathering with family is the main thing and both of my hobbies are fishing, besides that most of them are gathering with friends and neighbors, joking with friends" if we want to say "each one has its own share" |  |
| B (I14) | Gather with family |  |
| N (I15) | What makes me happy is that my health is good, thank God. |  |
| Scared | Hj.SR (I16) | Happy, gathering with children and grandchildren |  |
| K (I17) | If the problem is like that, I is, 'what's in', mutual understanding, and then too unambiguous. As it is, I see. We are grateful for what it is. Feeling happy with what we have, that's all. We don't have to say look for what we can't get |  |
| AR (I18) | Yes, maybe so, enjoy facing it. I mean that we accept everything sincerely |  |
| Wajo | H.B (I19) | Don't like to be angry, always tell stories with family, children and grandchildren. Neighbors often gather when they come home from prayer |  |
| Hj. BS(I20) | Yes, it is a good thing, because it is always given money to the child, it is forbidden to work with the child because later the child will give the income |  |
| Hj. H (I21) | Yes, it's also happy if you're given exercise, happy if your health is checked. Especially if it is said that there is a health check-up, all of them are brought to the posyandu because they are considered fun and useful |  |
| Stem | F (I22) | If all this time what has happened, if there is gymnastics and free treatment, gatherings, gatherings and counseling about the health of the elderly. But what we call is not the elderly, but the family, whether it is the child, the nephew, because there are elderly people who cannot move, so we call those close to the elderly. We teach how to take care of the elderly which is indeed right" needs special care, but if the treatment goes to the elderly directly, then he if there is an event" for example, the competition they are involved in there is also gymnastics there is also a competition on August 17 that the elderly like sometimes the elderly who say when we are |  |
| A (I23) | Happy because I like work, my own way, my family also supports me |  |
|  |  | H (I24) | Family gatherings, stories with neighbors |  |
| Biringkanaya | AS (I25) | If you are happy, it is because you get together with friends and activities" sometimes feel lonely also if such problems we can control because children will migrate |  |
| A (I26) | Gather with family and friends" |  |
| F (I27) | Get together with family, get together with friends". For the elderly I accompany, it is fun to get together with their friends, meet each other, especially when they get together with their neighbors. For example, we are in a complex anyway" retirees I notice that when they gather with fellow retirees they talk about their illness, in the afternoon "there is also a habit of sitting" in front of their house. I noticed that they relieved the fatigue of refreshing like that, especially when they gathered with their families and grandchildren. According to the information I was able to gather with his grandson, it was what made him happy, and his friends. |  |
| Mariso | I (I28) | Gathering with friends and many friends I have here |  |
| J (I29) | Of course, health, yes, if the family factor doesn't seem to be because it's difficult to talk about |  |
| DN (I30) | The atmosphere that makes the elderly here happy, the family factor is also what can make them happy |  |
| Rappocini | H.E (I31) | Just accept what it is. In terms of gatherings with family, and grandchildren as well |  |
| R (I32) | Of course, what makes the elderly happy is gathering with their children, daughters-in-law, and grandchildren, the neighbors around them are also good so it becomes happiness for the elderly themselves |  |
| AA (I33) | I always suggest myself that I should suggest that I am happy, such as gathering with friends, gymnastics at the health center. |  |
| Sangkkarang | MK (I34) | Gathering with family, I don't often hang out if there is a sports activity, I go to exercise at the health center on Fridays. If someone dies, I go with us who take a bath first, if there is a married person, I also often help but now I can't move anyway because I am old. It is also common to still go outside the island often like to Makassar if there is an interest if there is a nephew who is married. If fellow elders rarely gather as well, but usually gather, I feel happy when they get together. Activities at home I usually cook |  |
| M (I35) | Gather with family, children and grandchildren |  |
| H (I36) | If you want to come here, the elderly are given skills so that the activities are numerous, gathering with the elderly, their friends, there is indeed counseling such as the topic of the elderly, so there is no elderly school here. |  |
| Tamalate | M (I37) | Yes, I don't know, but this heart is happy that there is no chaos when you get together with your family. And I don't feel stressed, it's just that I wonder why I got this kind of disease. I used to work like this, selling ready-made food cakes and that every day |  |
| S (I38) | What makes me happy now is because of my grandchildren, my son has two grandchildren and there are also two so that's the reason I'm happy because of the family factor |  |
| M (I39) | Because what makes them happy is that they respond to their complaints and continue what they give input, so they are happy and silent if we interview them anyway. |  |
| São Paulo | J (I40) | What makes me happy is because of my family, children, grandchildren, and health is also what makes me happy because we get together with our children and grandchildren are very happy because we have retired, so getting together with them is very good. |  |
| I (I41) | Happy because life like this is healthy, and there are no complaints and just stay in high school and take care of grandchildren like school clothes |  |
| R (I42) | Of course, if there are activities even if they don't have activities every day, at least these elderly people have activities once a month, they can make new acquaintances too, and here the family is also a happy factor, especially if it is with their grandchildren, right? |  |
| End of View | MM (I43) | How easy it is, there is nothing that I bother if we are difficult, it will be painful, so I don't expect to be dizzy and gather with my neighbors here at my dining table in this hallway, if I eat I go out and take a bench" and I manage these plants |  |
| M (I44) | I'm happy because I don't have to think about debts, I keep because there are always children and grandchildren coming to the house, because my 4 or 3 children are married so they don't live with me anymore, but usually I am approached by grandchildren who also often come |  |
| HW (I45) | If I am usually asked, "The examination of the elderly is once every 3 months, sometimes they ask when the examination will be done. And maybe they are happy if they are checked every month. and many attended, sometimes they attended around 40 more people. If you do gymnastics yourself, if you want to join RT/RW. They are interested, sometimes they come every week to the health center to participate in gymnastics, it's called prolanis. If there are only 2 elderly schools that participate in this village, there are a total of around 75 participants. 5 elderly men". Well, during the school of the elderly, how many dimensions have been taught. For the elderly school, it is for the dimension that is taught only because it has only been 1 meeting. |  |
| 2. | What are some needs related to mental or psychological health that you think are important in old age? | Mango | Hj.A (I1) | No, it's good I guess. And there are my grandchildren at home and now I am alone. And don't feel lonely when you're alone. | 1. Want to be noticed with family: (S I6), (F I27), (I I28), (R I32), (AA I33), (M I35), (M I39), (J I40), (R I42). 2. Lifestyle: (NS I4), (A I7), (AS I8), (S I9), (Hj.SR I16), (Hj.H I21), (F I22), (A I23), (H I24), (DN I30). 3. Economic Needs/Social Assistance: (B I14), (J I29), (M I37), (I I41). 4. Tranquility : (AS I5), (H I10), (K I17). |
| JS (I2) | I'm lonely, because I'm quite entertained by my elderly friends because I'm RW jd always patrols when I get together with the gentlemen in this area |  |
| W(I3) | If it's lonely like that, I don't see it because many of them are accompanied by playing with their families, usually what makes them the most happy, of course if they get together with their grandchildren, it's normal for them to be at home, there is no loneliness like that |  |
| Squirt | NS (I4) | Needs to eat modestly, and always consume fruits and affordable |  |
| AS (I5) | Facing situations do not panic in a calm, relaxed, and other happy situation |  |
|  |  |  | S (I6) | Yes, maybe if the others have most of their children, they say they are less talked to, less supported, and not accompanied either. Each of them is married, so there is a pity that her husband has died, she lives alone in her house, and is not invited to interact. Is it not the smallest of the community? Yes, maybe, some of them feel that way, given back. Because his age is considered old, he can't do anything. Even if it is possible to be spied on in grandchildren. When he came home, his son picked up his grandson. I have been invited to tell you, maybe if the desire does not come, the children and grandchildren do not come, sometimes it is said that there is. It should still come. So it's also good that it's actually a school for the elderly. There may be a time, a month or a few months taken for the child or grandchild who is close to the elderly |  |
| Tamalanrea | A (I7) | Morning walk every day. Then in the morning I eat boiled eggs, sometimes 1 sometimes 2 eggs |  |
| AS (I8) | In this old age, I think a lot of the main thing is health, then if I compare it there in Medan, the name has been hanging out for a long time, it's good and there are gatherings with friends, complex, and only 3 years in Makassar |  |
| S (I9) | The health service is good here, the posyan, only so for the examination is still lacking |  |
| Bontoala | H(I10) | Actually, it's not how if there is no ji, it means that there is no flash. Actually, I am a relaxed person and not burdened with negative thoughts and carried away by leisurely enjoyment, I face life so I don't want to be difficult |  |
| R (I11) | At my age I have to think positively |  |
| SD (I12) | Yes, attend an elderly school, because participation in an elderly school can make you feel cool |  |
| The End of the Ground | H (I13) | The problem of needs is because if I also sell at home I am a retired sugar factory, the elderly here recite and there is an elderly school and it is scheduled for Thursday |  |
| B (I14) | If my need is to eat nutritious, because we are sorry to wait for help |  |
| N (I15) | What is definitely important is that psychologist yak arna not all children are ready to have the elderly, he does not know how to take care of the elderly, such as there is a burden of how to encourage them to become resilient elderly This means that they have confidence even though they come from underprivileged families. Even though we are in an environment like this, there is still a need for joint activities, such as recitation or lectures. Such activities are important because they can increase their knowledge and be a provision for self-preparation. That way, at least they are aware of the existing conditions and can try to improve themselves |  |
| Scared | Hj.SR (I16) | Taking medications that have been prescribed by a doctor and routinely |  |
| K (I17) | If the problem is like that, I am 'afat di', understanding each other, continue to be too unambitious like that. As it is, I see. We are grateful for what it is. Feeling happy with what we have, that's all. We don't have to say look for what we can't get |  |
| AR (I18) | Yes, I see, mentoring, maybe |  |
| Wajo | H.B (I19) | I used to like to play football, and I rarely exercised |  |
| Hj. BS(I20) | None |  |
| Hj. H (I21) | The emotional needs of the elderly are still not much touched. Ideally, there is a psychologist who can assist, but due to limitations, extension workers often act as resource persons. In fact, activities that support the emotional, communication, and social dimensions are needed so that the elderly feel cared for and not easily saturated. |  |
| Stem | F (I22) | They have received complaints and when there is an activity like this, they are happy and they feel entertained and do not feel excluded like that. He feels that he can still do so. Some of my elderly are still healthy and still work like selling at home |  |
| A (I23) | A complete health check is like cholesterol because here there is rarely such an examination |  |
| H (I24) | Health checks are also important. Eating fruit is therefore healthy, after all, adding vitamins as well |  |
| Biringkanaya | AS (I25) | I prefer gymnastics because it moves |  |
| A (I26) | If we get together, this will be relaxing, after all, if we are alone, many thoughts can be stressful |  |
| F (I27) | Initially, when they retired, but as time went by, maybe because they were busy, so if they said they were lonely, they didn't. Now because they live with their children and grandchildren, on average, they don't say that here they are retired, they live alone, on average, they live in high school, their children and grandchildren. So at least they have entertainment, activities. Maybe the activities are in the office, at first I shouted not to go to the office, this is how I retire |  |
| Mariso | I (I28) | I don't feel lonely because here many of my family and friends can have fun laughing together |  |
| J (I29) | There is no such thing as social assistance |  |
| DN (I30) | Actually, the needs are related to health because there are usually many people who are sick and sick that they need if the environment is here |  |
| Rappocini | H.E (I31) | I need worship now, if there is sustenance, I want to do Umrah again. That's all, and don't feel lonely either because it is accompanied by prayer |  |
|  |  |  | R (I32) | They must be cared for more often with their children and grandchildren, because it is not pleasant to feel alone, so they must be cared for by their families |  |
| AA (I33) | Yes, of course, if related to that I often feel lonely, although many people I usually feel lonely but usually I also take care of my grandchildren, first the house was crowded but after there were children married so there were few people at home so the remaining one child I lived with me, since there were many grandchildren usually at home |  |
| Sangkkarang | MK (I34) | Yes, I exercise often, so I don't feel lonely anymore |  |
| M (I35) | I've never had a problem with having grandchildren. |  |
| H (I36) | Of course, the government must pay attention to the elderly, so that there are also activities for them so that they are not bored if they are at home, so actually the elderly here need attention so that they can get activities or programs that make them not bored anyway if they continue to stay at home |  |
| Tamalate | M (I37) | Yes, it is normal to take into account the economic situation if there is a shortage, for example. And if the others are like this, we must be grateful for what they have done. There are many needs, in the household, now what is needed is daily life |  |
| S (I38) | Be careful, I'm just going to stay with my kids so I'm safe because I'm not too much |  |
| M (I39) | Many, for example, these elderly people complain about their children, no one takes care of them, and no one takes care of them. So these elderly people feel lonely |  |
| São Paulo | J (I40) | Of course, I need the attention of my children and grandchildren because we are old so if there is good help, it is good directly from the children |  |
| I (I41) | Usually, the so-called household complains that if there is no this, money moves. Recently, I have children and grandchildren and each one has its own busyness and I don't like to beg because my son also has his own family |  |
| R (I42) | Attention from family is most important for them so that they are not lonely in their old age. |  |
| End of View | MM (I43) | Like what, I don't feel lonely ji and don't feel dizzy ji. And just relax. Don't take care of people's questions, you will get dizzy yourself. |  |
| M (I44) | I'm an active smoker so I usually don't feel lonely here because I'm usually visited by my grandchildren so it's safe |  |
| HW (I45) | If all this time what I have been accompanying is flat"not because Alhamdulillah, they always blend |  |
| 3. | What interventions or programs do mothers or fathers currently need the most in old age? | Mango | Hj.A (I1) | Enough with this. Because there are sports noodles, there is an elderly school and itumi recitation that I need and my friends" | 1. Elderly Schools : (I10), (I13), (I14), (I17), (I19), (I24), (I26), (I33), (I40), (I41), (I42) 2. Health check-up: (I5), (I7), (I8), (I9), (I10), (I18), (I20), (I23), (I28), (I29), (I37), (I39) 3. Gymnastics : (I6), (I12), (I17), (I18), (I25), (I26), (I27), (I30), (I33), (I38), (I40) 4. Majelis Taklim : (I1), (I2), (I8), (I13), (I15) 5. Skills : (I18), (I21), (I36) 6. PMT Seniors: (I19), (I23), (I32), (I39) |
| JS (I2) | If the program is very good, it is actually an elderly school because I also participated in it, yes as the chairman of RW it is good indeed if we gather with the community, socialize so that we know the problems in the community |  |
| W(I3) | At most, there are actually taklim assemblies, social gatherings, and recreation, they love recreation because they all heal anyway if they are bored at home, actually elderly schools are also usually crowded |  |
| Squirt | NS (I4) | While I am an elderly student. It's only been 2 months and I'm happy to see the old ones. It's only been 2 times in school and BKKBN has been formed and I was appointed as my father's high school |  |
| AS (I5) | Elderly Posyandu Program. So sometimes with this posyandu, we the elderly also participate in it. In this case control health |  |
| S (I6) | Of course, there are only activities that do not make the elderly bored at home, whether it is sports or healthy activities |  |
| Tamalanrea | A (I7) | Actually, what is needed is to continue, for example, every examination such as uric acid, blood sugar, etc., must be continuous so that a person's condition can be known. And so it can be seen, thank God that it is healthy, so it must continue. If this is the program, it is at the posyandu, once a month and regularly |  |
| AS (I8) | Most of the studies, often go to the posyandu and close from here, just walk |  |
| S (I9) | If we are here, the program that is needed is health so that it can be multiplied |  |
| Bontoala | H(I10) | This is a factor regarding health in the environment here and cleanliness. There is a posyandu here and it happens that there are no educators here, there are no elderly schools and most of them are checked and they are not feeling well. |  |
|  |  |  | R (I11) | Attention, comfort, because the problem without any attention to the elderly feels excluded |  |
| SD (I12) | Gymnastics together |  |
| The End of the Ground | H (I13) | Elderly schools are important, those who were not understood before became understood. It's normal for us to just recite, now there is iqra and hone it again, it turns out that the way of reciting ta is considered correct turns out to be wrong, seen in the length and short and if in the village it is read normally. |  |
| B (I14) | I don't go to the school for the elderly, the elderly don't participate in the activities of the elderly |  |
| N (I15) | Actually, how to encourage them to become tough elderly, yes, strong and independent. So that means, he has confidence as well. Even though he is elderly from a family that cannot afford it, even though he is elderly in an environment like this, but it is necessary, he is also happy to be active. For example, if there is a recitation, we take it out on the road, so that it is happy, it means that he needs to refresh too, right? Or to make an activity here, to gather even if it is just to recite, even if it is for lectures, to give knowledge to him, it is important. His preparation is also that at this age of the elderly, we are indeed like this. He must know, so at least he can change himself as well |  |
| Scared | Hj.SR (I16) | There is none, and rarely participate in gymnastics and when I participate sometimes I get dizzy and cannot be exposed to the sun |  |
| K (I17) | At this age now, I'm just the name, how can I exercise better, here there is an elderly school but I don't participate because I participate in other places, if here it seems to be less moving if I join like that |  |
| AR (I18) | If we look at the elderly here, what activities are they actively in, maybe such skills, what? Oh, they are happy if there are activities, especially gymnastics. In the past, there were also skill activities, but when Covid stopped, so now there is no more. If this is done, there may be other activities. Now there are most meetings at Posyandu |  |
| Wajo | H.B (I19) | For example, donations from the government. I didn't know there was an elderly school and I didn't go to an elderly school |  |
| Hj. BS(I20) | No, because there are rarely activities only posyandu here. |  |
| Hj. H (I21) | The program needed is a more varied activity, not just a health check-up or regular meetings. The elderly here hope that there will be additional activities such as outings, skills training, or creativity |  |
| Stem | F (I22) | Maybe counseling and occasionally the elderly are taken off the road", training and some kind of refrehsing. If the reading corner is there for teenagers. If the problem of the program is still not comprehensive, it is still a certain dilopus indeed due to limited funds. So far, the hope is that the non-governmental fund program is wanted, but it needs to be seen again that the community has limitations. It may be different if the problem is in an environment that is quite capable of the community |  |
| A (I23) | Health is the same as social assistance because it is also worked. |  |
| H (I24) | The school is very popular so that it doesn't get bored because the school is closed every month. |  |
| Biringkanaya | AS (I25) | I think it's an elderly gymnastics program |  |
| A (I26) | Light sports, I haven't enrolled in an elderly school because of my busy schedule |  |
| F (I27) | My elderly are more interested in dictating activities, for example, being told to do gymnastics or some kind of sport. In the past, I had asked my mother, tomorrow we will have gymnastics activities, they are very enthusiastic. And if the elderly have school schedules again, the elderly ask "mommy gymnastics is again after all, ma'am". Well, last week there was no gymnastics and the elderly said "oh my mother, I don't have gymnastics". So that's where I caught them if they were really hobbies if they were gymnastics. I also noticed that at the 17san event, the average "supporters" are evenly distributed by the elderly who are busy. That's where they get together to meet their fellow seniors. |  |
| Mariso | I (I28) | If I am in the Puskeke, just check |  |
| J (I29) | Free health check-ups, because we are also old like this, there must be many people who are sick |  |
| DN (I30) | Gymnastics/sports activities for the elderly, socialization of fellow elders are also good |  |
| Rappocini | H.E (I31) | None |  |
| R (I32) | They always ask for PMT to give milk, because they also need such nurseries, and also they want to get such assistance |  |
| AA (I33) | If I do gymnastics because I like sports, it's because I gather with my fellow elderly friends because I also attend an elderly school, but at an elderly school I usually get that kind of material. |  |
| Sangkkarang | MK (I34) | None |  |
| M (I35) | None |  |
| H (I36) | A job that helps the family's economy |  |
| Tamalate | M (I37) | Complete examination of posyandu |  |
| S (I38) | Activities that make you bored at home here there are no such activities, because gymnastics exists but he per sub-district is not a special one for the village here, right? |  |
| M (I39) | The distribution of PMT at the health center, for pregnant women and toddlers, we continue to have TPK (family assistance), we go to the homes of the residents, the data of the toddlers who are worthy of help, there is also whether this child is the weight of the child |  |
|  |  | São Paulo | J (I40) | It's good if there is sports together with fellow elderly, it's good that we have a lot of acquaintances, here there is also an elderly school so it is very needed so that we don't get bored |  |
|  | I (I41) | Schools for the elderly |  |
|  | R (I42) | Schools for the elderly are so that they can get new knowledge, new friends, new activities so that they don't get bored at home |  |
|  | End of View | MM (I43) | Have been with the elderly for 1 day. The activities are like gymnastics, if my skill is sewing and ordinary crafts for children," he wants to make traditional clothes and take care of plants. |  |
|  | M (I44) | Health check-up, it's good, because I rarely do things like that now |  |
|  | HW (I45) | Their social activities also always participate in recitations, participate in community service activities, here they need each other and embrace. And regular recitations are carried out. Usually there is a schedule for dawn prayers, there is also a special schedule for reciting and there is also a ta'lim assembly. Not a lot of people in their 20s or 30s. |  |
| 4 | Are there social services that are still not available in your environment? | Mango | Hj.A (I1) | None. | 1. Social Services Lacking/Not Available: (I1), (I3), (I6), (I8), (I9), (I10), (I12), (I13), (I16), (I25), (I27), (I28), (I31), (I32), (I33), (I34), (I35), (I36), (I38), (I39), (I40), (I42) 2. Needs to be improved/still lacking: (I4), (I7), (I11), (I14), (I15), (I17), (I18), (I19), (I20), (I21), (I23), (I24), (I26), (I29), (I30), (I37), (I41) |
|  | JS (I2) | social services actually always gather to socialize at night, especially the average RT men in my area, so there is always a discussion related to |  |
|  | W(I3) | social services here in my opinion there is nothing lacking |  |
|  | Squirt | NS (I4) | There is a shortage, especially PMT posyandu for toddlers. Frankly, I am the one who handles it personally, until my grandchildren usually say "it's not usahmi who takes care of it" because maybe there is a pity for pregnant women, especially with their toddlers, elderly mothers, and personal concerns. The government should pay attention, especially to PMT, especially from pregnant women to the elderly, not just the pregnant women. The pregnancy is only 1,000 days. But the elderly also need it |  |
|  | AS (I5) | Do a lot for the benefit of this community that is smaller than us, who are more lacking than us, so it needs to always be there, light-hearted. Alhamdulillah, it was felt a lot |  |
|  | S (I6) | Nothing. |  |
|  | Tamalanrea | A (I7) | If social services I think there is something lacking, the first thing I see is the lack of cleanliness, many residents who do not want to see around their houses are usually clean, it can cause effects that can cause disease. Yes, that's all if it's a social problem |  |
|  | AS (I8) | I don't think so, from the start of RT/RW, thank God, it is safe, both of us go to the posyandu and the welcome is good |  |
|  | S (I9) | None |  |
|  | Bontoala | H(I10) | If for me there is no |  |
|  | R (I11) | It is still lacking because this activity does not exist specifically for spinach roads. |  |
|  | SD (I12) | Nothing. |  |
|  | The End of the Ground | H (I13) | None and fulfilled |  |
|  | B (I14) | Less |  |
|  | N (I15) | Many such as counseling are still limited to posyandu, at least once a month, the recitations that are here, there need to be skills actually. Not a skill, but at least an activity. Because I see that those who work here, the elderly, there are some who are still productive if there is an activity so happy |  |
|  | Scared | Hj.SR (I16) | Nothing, and prefer to stay at home |  |
|  | K (I17) | Activities such as health activities are only once a week. Whereas I like it every day |  |
|  | AR (I18) | There are many. Pity them too, they demand that. If there is something like a toddler mother, porridge is made every time, right? Such activities are also very necessary for the elderly. They also need a kind of PMT, if for the elderly men, at most that's all gymnastics that is usually done. But we are also afraid, because many noodles also suddenly have strokes. |  |
|  | Wajo | H.B (I19) | Less |  |
|  |  | Hj. BS(I20) | I don't know because there is still a lack of such activities here |  |
|  | Hj. H (I21) | Special social services for the elderly here are still limited. For example, creativity or vocational activities are rarely carried out. Most of the activities are still always on health checks, while other dimensions of the resilient elderly such as creativity have not been facilitated much |  |
|  | Stem | F (I22) | Yes, there is |  |
|  | A (I23) | Yes, it is still not enough |  |
|  | H (I24) | Yes, it is still not enough because it needs to be improved, it is a posyandu for the elderly and also to check cholesterol |  |
|  | Biringkanaya | AS (I25) | None |  |
|  | A (I26) | Actually less |  |
|  | F (I27) | None |  |
|  | Mariso | I (I28) | ooh there is nothing because I only checked at the health center and the environment is good |  |
|  | J (I29) | If it is indeed still lacking, it is because I myself feel that I need social assistance |  |
|  | DN (I30) | For social services here are still somewhat less available |  |
|  | Rappocini | H.E (I31) | Nothing. |  |
|  | R (I32) | I don't think so, because here it is complete, both health centers, posyandu and every RW has its posyandu, so there are 17 posyandu here |  |
|  | AA (I33) | There is no problem because there is a nearby health center here, there are also many posyandu in each RW, so I think it is enough |  |
|  | Sangkkarang | MK (I34) | If this is what I don't think I need anymore because it's enough for gymnastics, and making events |  |
|  | M (I35) | None |  |
|  | H (I36) | social services here are enough in my opinion |  |
|  | Tamalate | M (I37) | At the posyandu, the examination is incomplete, only tension and blood sugar |  |
|  | S (I38) | When it comes to social services, I don't think there is anything lacking |  |
|  | M (I39) | None |  |
|  | São Paulo | J (I40) | Social services here in my opinion there is nothing lacking because here the need is always there in my opinion |  |
|  | I (I41) | As long as it doesn't exist, because it's new. So I haven't felt it yet because we are the new elderly |  |
|  | R (I42) | I don't think there is anything lacking in social services, because if they get help, they usually get it. |  |
|  | End of View | MM (I43) | None |  |
|  | M (I44) | I think social services are not lacking here in my opinion. |  |
|  | HW (I45) | None so far. |  |
| 5. | What are the main difficulties for you in accessing health services or social services in Makassar? | Mango | Hj.A (I1) | Usualji klau far away if there is no delivery, I usually call a friend to pick me up, if there is also Mr. Aji here he will deliver. This is the study around here. | 1. No difficulty : (I1), (I2), (I3), (I5), (I6), (I7), (I9), (I10), (I11), (I12), (I13), (I14), (I15), (I17), (I19), (I23), (I24), (I25), (I26), (I27), (I28), (I29), (I30), (I31), (I33), (I34), (I35), (I37), (I38), (I39), (I40), (I41), (I42) 2. Close to health services : (I9), (I10), (I11), (I12), (I13), (I14), (I17), (I19), (I20), (I24), (I25), (I28), (I30), (I32), (I33), (I37), (I38), (I39), (I40), (I42) 3. Easy transportation : (I16), (I20), (I23), (I33), (I36), (I38), (I40), (I41) |
|  | JS (I2) | Access is actually not difficult, because here it is very close, the posyandu is usually in residents' houses, the health center is also close and for transportation is also easy, yes I am still strong to ride a motorbike and all sorts of things, and also I am still often invited to coordination meetings at the health center so I always go to my health center |  |
| W(I3) | The difficulty of accessing the posyandu and puskesmas is actually they are usually always escorted with their children, but that is also if the children are no longer there and cannot take them, also these elderly do not go to check because it is not strong for them to walk and if it is far from the place where the service usually does not go |  |
| Squirt | NS (I4) | Maybe when it comes to transportation to take it to the health center, it is necessary. If I personally don't exist. Unless other elderly people want to join because there is no cost, yes, if you want to participate, that's a sense of concern. The formation of the posyandu is because of me personally because of my belonging, I always instill that the posyandu is from and for the community. That's why I formed this posyandu from the 80s with my father. In the past, I didn't understand and I had up to 9 cadres and there was no SOP, I work for the community because of my concern |  |
| AS (I5) | Hmm I don't think there is any |  |
| S (I6) | None |  |
| Tamalanrea | A (I7) | No barriers |  |
| AS (I8) | If you go to the hospital, you will queue, if the mobilization is good |  |
| S (I9) | There is no difficulty for me, because the health service is quite close |  |
| Bontoala | H(I10) | Not really, that's what I said earlier, I just took it relaxed and for example there is no yes or no and the posyandu is close here. |  |
| R (I11) | There is no difficulty because all the nearby posyans are also held every month |  |
| SD (I12) | No, because if I have to go for a walk. |  |
| The End of the Ground | H (I13) | No, because every 10th there is a posyandu for health checks for the elderly and every month all routines are checked every month, for example, sugar, blood. And always present |  |
| B (I14) | If you want to go to the mall just a short walk |  |
| N (I15) | There is no one because here the posyandu is for services, thank God the cooperation of the health center is fine. It's just that if he is afraid that he is sick at night, for example, does this child not understand. If we are cadres, we understand, but if the child is at home, he doesn't understand, sometimes he keeps it at home. So actually it is also necessary to counsel for elderly families, not just the elderly. Let the elderly be repaired, if the family is still old-fashioned, this is this one. So there needs to be education for the elderly families themselves, not to make the elderly a burden for themselves |  |
| Scared | Hj.SR (I16) | I was carried on a hitchhike and that was before and I rarely went to the check-up, even if I was sick I was forced to go |  |
| K (I17) | There are no difficulties because here the pustu is close, the puskesmas is also close |  |
| AR (I18) | Maybe they are hampered by the lack of time, for example taking care of their grandchildren at home, or having difficulty going to that place. But if it is for health services, it is not likely, because it is close |  |
| Wajo | H.B (I19) | None |  |
| Hj. BS(I20) | It was not close because it was close to the posyandu, and was also escorted by the father, only it was checked and no medicine was given or a prescription |  |
| Hj. H (I21) | One of the difficulties is the limited budget. There is no special fund for elderly activities, so many programs cannot run optimally. Sometimes posyandu cadres even have to use personal funds for consumption or activity facilities |  |
| Stem | F (I22) | In the past, when it was formed, it was a bit difficult to gather the community, but we approached both the family and the elderly themselves, both in a gathering," door to door and also home visits for the elderly who could not be examined at the posyandu. And we want to know how they are doing if they are sick or homeless. If any of the neighbors say they are sick, we will visit their homes together with health workers and health centers |  |
| A (I23) | It is not difficult because the children also deliver and cadres too |  |
| H (I24) | It's not difficult because the posyandu is also close to home so you can just walk |  |
| Biringkanaya | AS (I25) | No barriers |  |
|  | A (I26) | Actually, there are no constraints but it's just the queue and the service is very good |  |
|  | F (I27) | None |  |
|  |  | Mariso | I (I28) | No |  |
|  | J (I29) | There is no real difficulty because the access is also close to here, and usually it is also delivered by the father |  |
|  | DN (I30) | There are no difficulties because their access to health services here is close to the motherland health center, and usually the elderly access is also easy because there are representatives to the posyandu here at the residents' homes, so usually nurses who come to the posyandu so the elderly are close to the posyandu do not need to go to the health center anymore |  |
|  | Rappocini | H.E (I31) | No, because I usually ride a motorbike I can still bring my own motorbike |  |
|  | R (I32) | If the difficulties are only a few, but there are also no and the difficulty is that there is usually the elderly who can't walk for a long time, so they need to be checked at home, that's why usually the posyannya is mobile so it is not troublesome for the elderly to walk far, so all affordable elderly can be checked. And usually there is also a direct visit to his house if he can't come at all |  |
|  | AA (I33) | Alhamdulillah, no, because I can still bring a vehicle and bring a car, we have to be tough elderly |  |
|  | Sangkkarang | MK (I34) | None |  |
|  | M (I35) | Not because I rarely go to the posyandu |  |
|  | H (I36) | Usually the elderly here want to continue to be visited, but to access services here is quite easy because it is usually also escorted with their children if it is indeed a health center |  |
|  | Tamalate | M (I37) | There is no one because if you go to the posyandu it is just a walk ji because it is close. Every 12th Posyandu inspection. Suppose they have activities at the usual health center, cadres retreat to the schedule |  |
|  | S (I38) | The difficulty is actually not because the posyandu near this house is behind the mosque and there are also children who deliver them if they go to the health center so |  |
|  | M (I39) | There is no ji, because the elderly here are close to his house. In terms of cadres, the elderly usually say that they are tired of going to school like complaining. But if the transportation problem is not because it is close |  |
|  | São Paulo | J (I40) | There was no difficulty because I could still bring a motorbike and also a car so it was easy for me to access it |  |
|  | I (I41) | There is no such thing if I go to school for the elderly and I am escorted by my child |  |
|  | R (I42) | There is no ji, because the elderly here are close to his house. In terms of cadres, the elderly usually say that they are tired of going to school like complaining. But if the transportation problem is not because it is close |  |
|  | End of View | MM (I43) | No, I usually take a regular grab as well as walk |  |
|  | M (I44) | There are no difficulties because the posyandu is held at my house, and it is also here near the health service, we can be escorted on a motorbike so access is easy in my opinion |  |
|  | HW (I45) | Alhamdulillah, everyone is close to Ji from his RMH. Usually the officers come to the house if the elderly cannot come |  |
| 6. | Are there any obstacles in receiving information or participating in programs from the government/community? | Mango | Hj.A (I1) | No, because there is a regular schedule in the WA group as well. | 1. No obstacles: (Hj.A I1), (JS I2), (W I3), (NS I4), (AS I5), (A I7), (S I9), (H I10), (R I11), (SD I12), (H I13), (B I14), (K I17), (H.B I19), (Hj. BS I20), (F I22), (A I23), (H I24), (AS I25), (F I27), (I I28), (DN I30), (H.E I31), (R I32), (AA I33), (MK I34), (M I35), (H I36), (M I37), (S I38), (J I40), (I I41), (R I42) 2. Through Whatsapp group: (AS I8), (S I9), (H I13), (AS I25), (F I27), (H.E I31), (R I32), (AA I33), (I I41) 3. Through cadres/Door to Door : (R I11), (H I13), (AR I18), (H.B I19), (Hj. BS I20), (A I23), (H I24), (DN I30), (AA I33), (H I36), (M I39), (J I40), (R I42) 4. Through the Announcement of the Mosque: (H I36), (M I37), (S I38), (M I39), (R I42) 5. Through the submission of RT/RW : (R I11), (A I23), (R I32), (I I41) |
| JS (I2) | There is a group of RWs and also the elderly, we usually inform them about it in groups, even if we don't have a cellphone, there are cadres and neighbors who can give them if they have that information |  |
| W(I3) | Usually we have groups that are elderly schools, even those who do not participate in elderly schools, there are RT/RW groups that can be informed through there, they are here the elderly are active, why do they use gadgets so we don't go door to door just inform the existing group |  |
|  | Squirt | NS (I4) | None |  |
|  | AS (I5) | None |  |
|  | S (I6) | Straight to the person. Because I said there were twenty Elderly. Meanwhile, only two quotas are registered. It is needed from the village. From the hall. I don't know where the elderly get information from. Yes. |  |
|  | Tamalanrea | A (I7) | No, sometimes if the posyandu is given information, sometimes there are students from Unhas sometimes provide enlightenment about health. |  |
|  |  | AS (I8) | No, it's always on the cellphone and dictated in the grub |  |
|  | S (I9) | Not really, because it was a slap in the face. |  |
|  | Bontoala | H(I10) | None |  |
|  | R (I11) | There is no problem, because every time there is a schedule that is given to the health center, each cadre has the responsibility to convey it from house to house or we convey it to the head of RT/RW |  |
|  | SD (I12) | None |  |
|  | The End of the Ground | H (I13) | No, it's in the grub and there are cadres and there are also my children who are cadres and always remind me that they say "it's the 10th of May" for example, the 10th coincides with a holiday, then the schedule is postponed or postponed |  |
|  | B (I14) | No, this is the state of the government he chooses" |  |
|  | N (I15) | If the Posyandu is not lacking. It's just that if there are usually BKKBN activities about the elderly, well, we sometimes have limitations in including our elderly because our elderly are not the elderly like smart people. Yes, for example, he is from S1, S2, what is really this person, so if he goes there sometimes he asks first, what does he mean there he doesn't understand. |  |
|  | Scared | Hj.SR (I16) | None, because I don't have a cellphone |  |
|  | K (I17) | Actually, if the program from the government is already transparent on our side, so there are no difficulties in that regard. The rest of us want to follow or not, it's very easy. Like Sir, Mrs. RW always conveyed that. |  |
|  | AR (I18) | If the delivery of information to the elderly is directly from the cadres who convey it to homes. If anyone wants to visit, this is me. If he can't, I'll call him. One by one, home care. |  |
|  | Wajo | H.B (I19) | No ji, I don't have a cellphone. So if there is an examination from the posyandu, you know with your mother |  |
|  | Hj. BS(I20) | There are no obstacles because usually the cadres tell |  |
|  | Hj. H (I21) | The obstacle is in the pattern of communication and coordination. The program often changes along with the change of village heads, so that continuity is not maintained. The elderly are also usually present if there is a "pull" such as food or assistance, not purely due to health awareness |  |
|  | Stem | F (I22) | There is no such thing as a problem |  |
|  | A (I23) | there are no obstacles because the information is usually through RT/RW which informs |  |
|  | H (I24) | There is no obstacle because the cadres who tell us directly will be the information to arrive. |  |
|  | Biringkanaya | AS (I25) | None, because all the information is sent via grub |  |
|  | A (I26) | For the time being, it has not been |  |
|  | F (I27) | None, because all the information is sent via grub |  |
|  | Mariso | I (I28) | None |  |
|  | J (I29) | There is no obstacle because the cadres here always convey information but that's because I rarely go out so I don't really know that |  |
|  | DN (I30) | There are no obstacles because usually cadres tell you from house to house and also the posyandu here is close so it is easy to tell the information |  |
|  | Rappocini | H.E (I31) | There is no such thing as a common way to convey through the Wu Dynasty |  |
|  | R (I32) | There are no obstacles because usually cadres announce, we usually immediately inform through the RW group so that the elderly can get all this information |  |
|  | AA (I33) | There are no obstacles because I myself am a cadre and usually the information is always sent to the garbage. |  |
|  | Sangkkarang | MK (I34) | None |  |
|  | M (I35) | None |  |
|  | H (I36) | There are no obstacles, because usually if there is a free health check-up, it is always informed through the mosque and there are also many cadres so usually tell them also from cadres |  |
|  | Tamalate | M (I37) | There is no such thing as a posyandu schedule in the mosque and it is also common to be postponed at the mosque ji na announce |  |
|  | S (I38) | There is no obstacle because usually such information is announced in ordinary mosques as well as told by neighbors |  |
|  | M (I39) | Usually, if I personally make a WA status, so the family can read and convey it again at the mosque, but we walk first, for example, tomorrow the schedule is so this is the day we go first to the elderly house and the next day we announce noodles in the mosque, who knows if they forget. |  |
|  | São Paulo | J (I40) | There are no obstacles, because usually here cadres go down directly to inform the residents, and also my son is a cadre so I also easily get the information |  |
|  | I (I41) | There is no ji, all the information I got from the chairwoman and shared it was also digrubbed |  |
|  | R (I42) | There are no obstacles because we are told that once the information is received, the cadres immediately call the elderly, if there is a big event, it is usually announced at the mosque so they always get the information. |  |
|  | End of View | MM (I43) | No, because there is a schedule, I am also diligent in the tak'lim assembly, I am called. And it is also common in the WA group. |  |
|  | M (I44) | There are no obstacles, because my son is a cadre and also continues to carry out posyandu always at my house so of course I always get information through cadres |  |
|  | HW (I45) | If the problem is with their information, they have their own schedule, as for the schedule that is sudden" or suddenly, I usually call from house to house and usually I also have their cellphone number I call. |  |
| 7. | Are cultural factors or social stigma an obstacle to seeking support? | Mango | Hj.A (I1) | No, I don't think all of them are the same" there is no adaji, which means that the Bugis area is special, it's not. All the same | 1. Supporting environment: (NS I4), (AS I5), (A I7), (AS I8), (S I9), (H I10), (R I11), (H I13), (B I14), (Hj.SR I16), (AR I18), (H.B I19), (Hj. BS I20), (F I22), (A I23), (H I24), (AS I25), (A I26), (I I28), (J I29), (DN I30), (H.E I31), (R I32), (AA I33), (M I35), (H I36), (M I37), (S I38), (M I39), (J I40), (I I41), (R I42), (NS I4), (H.B I19), (AS I25), (H I36), (I I41). 2. There is no ethnic discrimination: (F I22), (MK I34), (K I17), (I I41), (MK I34). |
|  |  | JS (I2) | For the tribe here, there is no dominance, so we are here quite peaceful, there is no social stigma like that, and the cultural factor is indeed good, yes in this manggala because we have mutual cooperation activities, I usually announce at the mosque to clean up the common environment |  |
|  |  | W(I3) | Regarding the Sebenanryy tribe here, there is no excess of them, they are all safe and peaceful |  |
|  | Squirt | NS (I4) | None, because the surrounding community supports |  |
|  |  | AS (I5) | No |  |
|  |  | S (I6) | Yes, thank God this is impossible because we are already in the city. Yes, it is different in rural areas. It's safe to say that the elderly are in the city. |  |
|  | Tamalanrea | A (I7) | If the socio-cultural factor does not exist |  |
|  |  | AS (I8) | There is no village itself so it's good |  |
|  |  | S (I9) | No barriers |  |
|  | Bontoala | H(I10) | Not ji either |  |
|  |  | R (I11) | No barriers |  |
|  |  | SD (I12) | In the school of the elderly, there are no such cultural elements |  |
|  | The End of the Ground | H (I13) | There are no obstacles, and there are no obstacles |  |
|  |  |  | B (I14) | None |  |
|  |  | N (I15) | Yes, there are also obstacles, sometimes the child thinks like this, he is old, he doesn't have to follow along like that, old noodles. Anyway, there is a lot of rudeness, maybe even because religious knowledge is also lacking, sometimes the child is rude to his parents anyway. |  |
|  | Scared | Hj.SR (I16) | None |  |
|  |  | K (I17) | Yes, because I'm still the person in, the term is still old-fashioned. So I, it means that I put forward the cultural problem. Because of this, if we put forward culture, finally the name of social sense arises. People who have forgotten the culture, finally the relationship between us is usually separated. Because culture teaches harmony |  |
|  |  | AR (I18) | Alhamdulillah, there are no obstacles |  |
|  | Wajo | H.B (I19) | None, and the community supports |  |
|  |  | Hj. BS(I20) | No barriers |  |
|  |  | Hj. H (I21) | There are cultural factors that are quite influential. For example, elderly men rarely attend because they consider domestic or health activities to be women's affairs. This shows that there is still a patriarchal culture that limits men's involvement in elderly programs |  |
|  | Stem | F (I22) | If it blends here, no one looks at the tribe. There is no cultural factor at all |  |
|  |  | A (I23) | No barriers |  |
|  |  | H (I24) | No barriers |  |
|  | Biringkanaya | AS (I25) | None, because all of them support |  |
|  |  | A (I26) | No |  |
|  |  | F (I27) | From what I see here, there is no PI who complains that they are not considered. Maybe because the difference may be even" here retires people who have lived in the dormitory so they don't feel underestimated because maybe they already live in a dormitory with this person they know each other at the kodim. So they don't feel underestimated, in fact, they just call it" after all. |  |
|  | Mariso | I (I28) | None |  |
|  |  | J (I29) | No barriers |  |
|  |  | DN (I30) | No barriers |  |
|  | Rappocini | H.E (I31) | None |  |
|  |  | R (I32) | None |  |
|  |  | AA (I33) | There are no obstacles here in my opinion |  |
|  | Sangkkarang | MK (I34) | There is no distinction between the two tribes and there used to be immigrants here but they did not settle and there are also Javanese people who live here who sell meatballs |  |
|  |  | M (I35) | None |  |
|  |  | H (I36) | For here, there are no such obstacles, because the residents here are quite good |  |
|  | Tamalate | M (I37) | no ji then |  |
|  |  | S (I38) | No barriers |  |
|  |  | M (I39) | No sii |  |
|  | São Paulo | J (I40) | No barriers |  |
|  |  | I (I41) | We are united, Bagusji. If we respect others, we will be appreciated by jeki too |  |
|  |  | R (I42) | If there are no obstacles here. |  |
|  |  | End of View | MM (I43) | None |  |
|  |  |  | M (I44) | There is nothing if it is safe here, everything is peaceful |  |
|  |  |  | HW (I45) | No, thank God. For example, if there are activities here, there are parties, they participate in nyawer too, so they feel entertained by the existence of culture" like that and they enjoy. |  |
| 8. | According to you, what programs or activities have helped the welfare of the elderly in the surrounding environment? | Mango | Hj.A (I1) | I'm waiting for when else this school will be, recreational activities besides that I am also active in walking" around the field and the police station 8 times, Alhamdulillah. | 1. Schools :(NS I4), (R I11), (H I13), (H.B I19), (Hj. H I21), (A I23), (H I24), (AS I25), (A I26), (F I27), (AA I33), (J I40), (I I41), (R I42) 2. Posyandu lansia :(A I7), (AS I8), (H I10), (H I13), (B I14), (Hj. BS I20), (AS I25), (F I27), (DN I30), (S I9), (K I17), (F I22), (I I28), (H.E I31), (DN I30), (R I32) 3. Social Activities : (AR I18), (R I32), (H I24), (N I15) 4. Rarely participate in activities :(Hj.SR I16), (Hj. BS I20), (J I29), (S I38), (M I37) |
|  |  | JS (I2) | Elderly School |  |
|  |  | W(I3) | Of course, there are senior schools. |  |
|  | Squirt | NS (I4) | Schools for the elderly |  |
|  |  | AS (I5) | Including I think this posyandu is very helpful. |  |
|  |  | S (I6) | For now, yesterday I... What I follow, the Seven Dimensions seems to have covered. It already includes all those Seven Dimensions. Which one is Mami's elderly? |  |
|  | Tamalanrea | A (I7) | Elderly posyandu |  |
|  |  | AS (I8) | Elderly posyandu |  |
|  |  | S (I9) | The program can hold elderly gymnastics, routine check-ups |  |
|  | Bontoala | H(I10) | Elderly posyandu |  |
|  |  | R (I11) | Elderly schools, because since there is an elderly school, they can all gather. |  |
|  |  | SD (I12) |  |  |
|  | The End of the Ground | H (I13) | Elderly schools and posyandu |  |
|  |  | B (I14) | Elderly posyandu |  |
|  |  | N (I15) | Yes, the program is their gathering, there is a culinary festival for the elderly, Yes, every August 17 we have an elderly culinary festival, even involving some of the ambassadors had a tumpeng competition for the elderly so he was happy |  |
|  | Scared | Hj.SR (I16) | There is an elderly school, but I don't follow it |  |
|  |  | K (I17) | The program that has helped is the center with an examination check, and also I said earlier that there is gymnastics although it is rare but it also helps |  |
|  |  | AR (I18) | :d Isini always holds meetings for the elderly but only women, the activities are also useful because all the elderly participate and some of them are not just at home. |  |
|  | Wajo | H.B (I19) | Schools for the elderly |  |
|  |  | Hj. BS(I20) | There are few activities here, only posyandu |  |
|  |  |  | Hj. H (I21) | The elderly school is one of the programs that is quite helpful, because in it there are seven dimensions of resilient elderly that can be touched. However, because only a few elderly schools are running, the impact is still limited |  |
|  | Stem | F (I22) | Health and Exercise Check-ups. If at the posyandu, there are more than 50 elderly people who attend. The elderly are grouped again, pre-elderly and the elderly, we group them like that and they also have control books like toddlers. For example, if the cholesterol test is high, we will take medicine from the health center. And every month there is a 26th day where there are teenagers, pre-elderly and elderly who do have a control book |  |
|  |  | A (I23) | Elderly schools are very helpful because I like to travel, I like to travel long distances even though they are long distances |  |
|  |  | H (I24) | A school for the elderly is a place where people can get together with other seniors so they can talk about all kinds of things. |  |
|  | Biringkanaya | AS (I25) | Elderly schools and posyand |  |
|  |  | A (I26) | Schools for the elderly |  |
|  |  | F (I27) | Schools for the elderly and also posyandu |  |
|  | Mariso | I (I28) | Personally, I often go to the health center for health checkups |  |
|  |  | J (I29) | I don't think so, because no one helps me because I don't participate in elderly activities. |  |
|  |  | DN (I30) | The program that helps is like the posyandu, there they always do health checks and also quite a lot of elderly people usually come to the posyandu, around 10-15 people |  |
|  | Rappocini | H.E (I31) | Personally, I often go to the health center for health checkups |  |
|  |  | R (I32) | The program that we usually hold is a month (fitness exercises for the elderly) the health center holds all elderly people to come up to 50-60 people, because they are also a form of social gathering, so they are diligent in coming because the social gathering is binding. |  |
|  |  | AA (I33) | Of course, schools for the elderly are because it helps them not to stay at home so that we the elderly are not bored, so an elderly school is very helpful |  |
|  | Sangkkarang | MK (I34) | The cadres are very good and gymnastics activities are very helpful for the elderly |  |
|  |  | M (I35) | Gymnastics, I like gymnastics at the health center |  |
|  |  | H (I36) | What helps is only the gymnastics of the elderly because that's when they are gathered, it's just that we still don't have an elderly school |  |
|  | Tamalate | M (I37) | There are gymnastics activities but I can't participate in gymnastics because if I stand for a long time I can't stand it because of illness |  |
|  |  | S (I38) | Activities here are rare, so I don't know if it's |  |
|  |  | M (I39) | Creativity or skill because gymnastics is usually done at the health center. His creativity is elderly so that they are not saturated. At least they have activities and don't feel lonely and talk to elderly friends. If the elderly male is active and has regular stories in the afternoon. |  |
|  | São Paulo | J (I40) | The elderly school here is very helpful because we are given material related to the needs of the elderly which is very good |  |
|  |  | I (I41) | I have been to the school for the elderly 3-4 times. Because the first one is a hotel, the second is me outside and the third is at UPTD, otherwise it's a meeting 1 month 1 time. Regarding spirituality and marriage regarding the ideal age. There are 7 dimensions, about health, if we are elderly, what if we take care of our health, and just relax, don't think about it." |  |
|  |  | R (I42) | The elderly school here has only met 3 times so according to me it is very helpful, there is also gymnastics at the health center here |  |
|  | End of View | MM (I43) | The ta'lim assembly every Monday recites at the imim, Wednesday recites at the imim on Saturday, recites at the Hikmah mosque, on Saturday the hallway recite if I am told that the lecture "I like it, but if I recite I like it" |  |
|  |  | M (I44) | If I live in a small neighborhood, yes, yesterday there was a gymnastics activity but since the change of the village head there has been no more activity even though it is healthy |  |
|  |  | HW (I45) | There are many studies, gymnastics, ta'lim assemblies and here there is also an elderly school. |  |
| 9. | Are there any community activities, organizations, or services that could potentially be further developed for the elderly? | Mango | Hj.A (I1) | The School of the Elderly. |  |
|  |  | JS (I2) | Elderly schools, family role gymnastics certainly support, yes, especially our neighbors here, my residents are very good because they are very compact in terms of elderly activities like this, so that we are not bored if we are just at home, that's why the elderly school has quite a lot of students. | 1. Elderly schools :(NS I4), (R I11), (Hj. H I21), (H I24), (AA I33), (J I40), (I I41), (R I42) 2. Gymnastics :(S I6), (A I7), (AS I8), (AR I18), (DN I30), (SD I12) 3. Skill Activities :(S I6), (A I7), (AS I8), (AR I18), (DN I30), (SD I12) 4. There have been no activities :(H I10), (B I14), (K I17), (A I23), (I I28), (J I29), (H.E I31), (R I32), (MK I34), (M I35), (H I36), (M I37), (Hj. BS I20) |
|  |  | W(I3) | The good thing is that all of them participate in the elderly school for its development, of course in each meeting different activities can be developed through it they make skills, get materials, participate in gymnastics |  |
|  | Squirt | NS (I4) | Later, I will try to develop around me the elderly who do not go to school so I can develop with what knowledge I can get |  |
|  |  | AS (I5) | Eee there is a Taklim Council for the elderly, we do a Taklim Council at the Mosque. Because of this community, we feel happiness |  |
|  |  | S (I6) | That's what gymnastics was all about. Those who participated in gymnastics were also not bad. So what is creativity? What kind of activity does it mean? That's what cooks. Maybe if the Elderly are in their 60s. Female elderly, when compared to male elderly, is rare because the form of activity is directed towards women. But it really can, right? The sewing is mostly male. Then there are many chefs too |  |
|  | Tamalanrea | A (I7) | If the elderly are here, first here sometimes the elderly play table tennis etc. |  |
|  |  | AS (I8) | No, at home. Once" gymnastics and there are afternoon walking activities if you have time |  |
|  |  | S (I9) | Posyandu continues to be here |  |
|  | Bontoala | H(I10) | Nothing, because it has already been formed |  |
|  |  | R (I11) | There are a lot of them, but because we are in the middle of the market, it's hard to keep up with them. |  |
|  |  | SD (I12) | I don't know what the name is, but I forgot what it was. Because it's practically very easy to feel like it's just mixed, the dye just needs to be dyed, so it's really easy if that's the case. I like gymnastics because how happy I feel when I participate in gymnastics like that. |  |
|  | The End of the Ground | H (I13) | For example, the management of the posyandu is further improved |  |
|  |  | B (I14) | None |  |
|  |  | N (I15) | Yes, there are usually some of us involved in our business, such as scattering shredded bonbon, which is light, making pickled chili, and the businesses of the elderly. There are opportunities in the future maybe yes |  |
|  | Scared | Hj.SR (I16) | Perhaps it was the possibility. |  |
|  |  | K (I17) | If I don't have an idea, it's because it's RW's mother. |  |
|  |  | AR (I18) | There is, maybe it's gymnastics. Yes, it's okay, if for example someone can facilitate, it's okay too. The elderly are also interested if it is held like that. Later, if there are gymnastics activities, after that they can also be educated. Asked, 'Do you want to do this, what do you want to eat?' I want to be normal. Because indeed, if they are given activities, they are also happy. There are also ji who have activities, but if they stay at home, they can sleep |  |
|  | Wajo | H.B (I19) | Elderly program for complete check-ups |  |
|  |  | Hj. BS(I20) | I don't know |  |
|  |  | Hj. H (I21) | There is, for example, developing an elderly school in each village, currently there are only three places, but ideally it can be expanded to eight villages so that more elderly people feel the benefits |  |
|  | Stem | F (I22) | Yes, what does it mean, oh yes like participating in social gatherings, tak'lim assemblies, crafts. There used to be a lot of people who used to be able to make flowers for maulid, but not all of them because some people couldn't hear the noise. And they only came for a medical checkup. There is no school for the elderly, we have talked about forming a school |  |
|  |  | A (I23) | I don't know |  |
|  |  | H (I24) | There is no way that elderly schools need to be developed to be more active |  |
|  | Biringkanaya | AS (I25) | The match activity needs to be proposed. And what are the activities that are held once a month |  |
|  |  | A (I26) | There are such as retired organizations such as for example if we gather every week while having social gatherings and joking. And it is necessary and already running |  |
|  |  | F (I27) | Actually, so far the elderly are far away if they want to get treatment in terms of health, there are those at the health center, but more often they also open an elderly posyandu, so the obstacle is that the elderly posyandu only provides tension and blood sugar checks. However, the elderly want to be fully examined, but the tools are not there |  |
|  |  | Mariso | I (I28) | None |  |
|  |  | J (I29) | I don't know because I'm not used to it. |  |
|  |  | DN (I30) | For that there is actually none, because we here only rely on posyandu or gymnastics for the elderly like that if for big activities there is nothing that can be developed |  |
|  | Rappocini | H.E (I31) | None |  |
|  |  | R (I32) | For the time being, there is no |  |
|  |  | AA (I33) | In my opinion, the elderly school needs to be added skill activities so that we don't forget, such as cooking, knitting, so that who knows, we can also add so that our brains are always trained |  |
|  | Sangkkarang | MK (I34) | Not here yet |  |
|  |  | M (I35) | None |  |
|  |  | H (I36) | Not here yet |  |
|  | Tamalate | M (I37) | None |  |
|  |  | S (I38) | It's good if there are activities to gather with fellow elderly so that we don't just stay at home, and also if there are activities that can nourish us |  |
|  |  | M (I39) | All the elderly are diligent, all come to the posyandu, even though they usually don't have any information, they often ask when the posyandu will be again. There is also a tajlim assembly group here, once a month and about 10 people are present |  |
|  | São Paulo | J (I40) | Elderly schools here are good if they have skills so that we are not given only material, but because it has only been 3 meetings, it is possible that not only the material is given, maybe there are others |  |
|  |  | I (I41) | There is no such thing as a skill like a lecture. |  |
|  |  | R (I42) | It is good that if the elderly school is developed, there are skills so that they can also produce it, for fear that if the elderly here are given only materials, the elderly here will no longer want to come |  |
|  | End of View | MM (I43) | The School of the Elderly. |  |
|  |  | M (I44) | I don't know if it's because I'm old enough to be involved in activities but I've always been a fan of the sport in the morning. |  |
|  |  | HW (I45) | So I was still at the health check for the elderly that must be equipped in this village, it's normal and a pity if there is an elderly posyandu asking for a blood pressure check, our blood sugar says there is no one, so they need it for their health check-up |  |
| 10. | What is the role of family, neighbors, or community groups in supporting the needs of the elderly? | Mango | Hj.A (I1) | Alhamdulillah, I have always been supported by my children and husband. My husband does not attend the school for the elderly, Mr. Aji used to pick up his children from school, grandchildren, and used to go back and forth again. | Strongly Support (NS I4), (AS I5), (S I6), (A I7), (AS I8), (S I9), (H I10), (SD I12), (H I13), (B I14), (Hj.SR I16), (K I17), (AR I18), (H.B I19), (Hj. BS I20), (Hj. H I21), (F I22), (A I23), (H I24), (AS I25), (A I26), (F I27), (DN I30), (H.E I31), (R I32), (AA I33), (MK I34), (M I35), (H I36), (M I37), (S I38), (M I39), (J I40), (I I41), (R I42) (NS I4), (A I7), (AS I8), (H I10), (H I13), (N I15), (Hj. BS I20), (A I23), (H I24), (AS I25), (A I26), (J I29), (DN I30), (R I32), (AA I33), (H I36), (S I38), (R I42) |
|  |  | JS (I2) | The role of the family is certainly supportive, especially our neighbors here, my residents are very good because they are very compact in terms of elderly activities like this, so that we are not bored if we are just at home, that's why the elderly school has quite a lot of students. |  |
|  |  | W(I3) | Well, if the role of the family, of course, in Manggala is very supportive, because as they say, children want their parents to only do activities at home so that they are not bored, it is good if the elderly go to activities so that they gather with each other, laugh, discuss with their age |  |
|  | Squirt | NS (I4) | The family is indeed supportive, neighbors. And the people there asked "Let's go to school, mother" and there was indeed a schedule from BKKBN |  |
|  |  | AS (I5) | Good |  |
|  |  | S (I6) | Very good and supportive |  |
|  | Tamalanrea | A (I7) | If the community is here, fellow elders often gather, what is the story if it is on the tennis court, it is a story on the court, if the family is good and supportive, thank God. |  |
|  |  | AS (I8) | Good and supportive family and good neighbors all here |  |
|  |  | S (I9) | Always good, and contribute |  |
|  | Bontoala | H(I10) | Good, especially supportive family, familiar with neighbors too |  |
|  |  | R (I11) | Very supportive because I am always looking for when there will be a posyandu, there will be another event |  |
|  |  | SD (I12) | Everyone supports all my children, my son-in-law even this is very supportive. There was even one of my children who said that they didn't want to go to an elderly school, one of my children said that my children were six anyway so I said because if I stopped going to school for the elderly, I didn't go anywhere, so I just stayed at home. If you go to a school with your friends, you will be invited to go to school with your friends. There is one of my children who is such a person who because he supports him is my son, so he said so to me, because he supports attending an elderly school |  |
|  | The End of the Ground | H (I13) | The family is all supportive and the neighbors too |  |
|  |  | B (I14) | Supportive family |  |
|  |  | N (I15) | If we are here, the elderly already understand. If you don't understand why he came here, anyway? For example, if someone dies, take what shroud here, someone who is sick sometimes reports here. It's just his family, the obstacle is there. Sometimes it's lazy if she asks for this, but there are also those who are diligent with their children if they say, I can't go to meet at Mrs. Aini's house, ask to be carried by her child |  |
|  | Scared | Hj.SR (I16) | Well, I used to be banned from going to the market because I was worried that I would be alone |  |
|  |  | K (I17) | My son is always supportive. |  |
|  |  | AR (I18) | Very, very responsive. Here his important thoughts are directed. Well, that's why I told my friends |  |
|  | Wajo | H.B (I19) | Very good |  |
|  |  | Hj. BS(I20) | Yes, their families are supportive, so are the neighbors |  |
|  |  | Hj. H (I21) | The role of the family is very important, but sometimes the elderly are absent because they have to take care of their grandchildren or take care of the house. Neighbours and community groups can also be encouraged, but this support needs to be better facilitated to increase participation |  |
|  | Stem | F (I22) | So far, the family has been very supportive and they deliver. It's just that first of all when they want to form this, first those who don't want to participate, so when it has been formed they always connect with the assistance of the social service and we explain that we are not from the assistance of the social service and we are only here to focus on the health of the elderly, care and so on there is no such thing as assistance" well that's the problem they want like to have assistance, But there are also those who really need help, such as those who need wheelchairs and funds from the social service. And for example, if it is gymnastics" or other activities, we bring ordinary souvenirs that love is usually from the health center. And if any of our parents are sick, there may be souvenirs given but so far it depends and that is from their personal funds |  |
|  |  | A (I23) | Yes, their families support them because they are also cadres so they are very helpful, especially neighbors. |  |
|  |  | H (I24) | Yes, their family supports their neighbors as well as support |  |
|  | Biringkanaya | AS (I25) | The role of family is very supportive when I participate in elderly school activities, and I am very happy to gather with friends and neighbors |  |
|  |  | A (I26) | The role of family is very supportive, both from family and friends" |  |
|  |  | F (I27) | The role of the family is very supportive of participating in school activities for the elderly, and they are very happy to gather with family, friends and neighbors around |  |
|  | Mariso | I (I28) | Okay |  |
|  |  | J (I29) | The role of neighbors and community groups is quite helpful in my opinion |  |
|  |  | DN (I30) | For the role of the family, of course they support, especially their children, who certainly help their parents who are already elderly, and the neighbors here are also very supportive. |  |
|  |  | Rappocini | H.E (I31) | It's mediocre because so far we have only been told through announcements, announcements on social media, there are activities like this before we participate. Otherwise, no. If the role of the family is very supportive of mother, so are the children, and so are the wives |  |
|  |  | R (I32) | Every family must support the needs of the elderly, yes, neighbors always support the residents here, thank God it's good |  |
|  |  | AA (I33) | The family is of course supportive because my two children are married, so it is very supportive of my needs, also because I am a cadre who is also known to be the neighbors here are very close and very supportive of them as well |  |
|  |  | Sangkkarang | MK (I34) | Excellent |  |
|  |  | M (I35) | Excellent |  |
|  |  | H (I36) | The role of the family here is certainly very supportive, even the neighbors are very supportive because here it is very family, so the needs of the elderly |  |
|  | Tamalate | M (I37) | The role of the family in the activity is there and supportive, and ordinary neighbors help |  |
|  |  | S (I38) | The role of the family is of course to support the neighbors and usually always tell them if there is such information |  |
|  |  | M (I39) | Good and want to help the elderly. And if from an elderly family, their children support |  |
|  | São Paulo | J (I40) | The role of the family is very supportive as I said earlier, my son is an elderly cadre so he is very supportive of the needs of my elderly, my son is also the one who told me to go to an elderly school, and the neighbors here are also very supportive |  |
|  |  | I (I41) | Children support the important thing to take care of their health. Neighbors are also helpful and active |  |
|  |  | R (I42) | Here it is very family, both neighbors and community groups are usually very compact if they want to invite activities like this, so they are very supportive |  |
|  | End of View | MM (I43) | iye always help and indeed have to help each other and usually also eat together in the hallway |  |
|  |  | M (I44) | Of course, the role of family and neighbors is to support because here the community is harmonious, so if you need help or whatever, you can always get support from whoever it is |  |
|  |  | HW (I45) | well, their fellow elders often tell stories and their families will definitely support |  |
| 11. | What are your expectations for social innovations or new programs that can improve the welfare of the elderly? | Mango | Hj.A (I1) | Hopefully, the school for the elderly will always continue to run, tahsin also if the recitation | 1. Expectations for the government: NS I4), (US I5), (A I7), (N I15), (Hj.SR I16), (Hj. H I21), (F I22), (A I26), (F I27), (H.E I31), (R I32), (MK I34), (M I39), (I I41) 2. Hope for the sustainability of elderly schools :(S I6), (A I7), (SD I12), (H I13), (B I14), (H.B I19), (Hj. BS I20), (A I23), (H I24), (AS I25), (A I26), (F I27), (M I35), (M I37) 3. Elderly Activities and Skills Development: (R I11), (SD I12), (K I17), (AR I18), (AA I33), (H I36), (J I40), (R I42) |
|  | JS (I2) | The hope is actually not too much, because we the people here are already very good in carrying out activities, it's just that it's good if there are more of these activities, and also related to facilities, many of them have been damaged, so hopefully there will be the procurement of the latest facilities |  |
|  | W(I3) | Hopefully, it's good if all the elderly attend this elderly school, it's common here that they don't want to gather if they don't have friends, so they don't have it, and for the new program currently there is no one we just want to develop a better and better elderly school so that the elderly can have very interesting activities |  |
| Squirt | NS (I4) | Hopefully the government will always pay attention to the community, especially the elderly, and their needs |  |
|  | AS (I5) | I hope that the elderly will listen to the proposals and the government will do many activities related to the elderly themselves. The government must go down to meet the elderly directly so that they understand. Not only the government and us, but the health team also made many visits. |  |
|  | S (I6) | My hope is that the school for the elderly must be continued. And even if there is a regular meeting, it is an elderly school. Make it once a week, once a week. There was one time like that I mentioned. There must be an invitation from his family, his closest relatives. So we are just involved. So we tell you that we have the elderly at home. We have to do the same with the elderly. Especially if your child is a child. No longer from childhood, from not seeing the world. This old man has his head down, his feet up. Don't after growing up, after this old age the elderly are not seen. We wouldn't be in the world if there were no Elderly. It should be the most important thing in a country. Indeed parents. |  |
| Tamalanrea | A (I7) | If the program is about the problem of the elderly, I say that if possible, it must continue. Judging from the government, don't just expect from the direction of the BKKBN that must continue, so that we can also find out how the environmental conditions of the community are |  |
|  | AS (I8) | Hopefully, hopefully they will be more advanced and active and innovate again |  |
|  |  | S (I9) | The hope is that it will be increased so that the elderly are more active. |  |
|  | Bontoala | H(I10) | If it can be improved again if possible |  |
|  |  | R (I11) | The hope is that not only women will be recruited, but also hope that these elderly men can be included because this is an elderly school where no men are recruited, it is always women |  |
|  |  | SD (I12) | Actually, if it's like sewing, it actually exists in the PKK, except reading there is no such thing, if there is, we are very happy with the elderly because usually if the grandmothers don't have a job, if there is a place to read, they can read there once in a while. If the elderly are our desire, hopefully the elderly school will continue, because this story is already told at graduation once, we want it to continue. If talim assemblies like that are always present? If it is not held in the elderly, it has not been held either, unless there is a person to come to the mosque. |  |
|  | The End of the Ground | H (I13) | In the future, continue to be healthy, the advice and facilities are to develop health and always be healthy and see children" happy |  |
|  |  | B (I14) | I hope that the program will improve if I just live it sincerely and patiently |  |
|  |  | N (I15) | If we hope that these elderly will get allowances such as special assistance allowances for them. Don't give healthy love, just love the elderly. The hope is that there will be special assistance, there will be special protection such as JAMKESMAS, KIS for the elderly as a whole, yes, there are many hopes, how to educate, there are programs that educate their families, educate the elderly themselves. |  |
|  | Scared | Hj.SR (I16) | Hopefully the health facilities will improve even more |  |
|  |  | K (I17) | I wish I could do this because I love to read books and I love to read them. |  |
|  |  | AR (I18) | Male elderly can also enliven not only female elderly |  |
|  | Wajo | H.B (I19) | Hopefully in the future the program will be better |  |
|  |  | Hj. BS(I20) | Hopefully Posyandu can be given medicine if you really don't want to give medicine, just give a prescription later we will go to the pharmacy itself |  |
|  |  | Hj. H (I21) | The hope is that there will be more varied activities, budget support from the government, involvement of community leaders such as village heads or village heads in inviting the elderly to attend. That way, the elderly will be more enthusiastic to participate in such activities |  |
|  | Stem | F (I22) | Pay more attention to the elderly, especially in terms of their health, and gathering activities such as the tak'lim assembly, are more supportive of the activities of the elderly. Then we also hope that the program "like this is holistic, so it does not run alone". Actually, it has been asked to the BKKBN to cooperate, but it is difficult if it is indeed from the top level that does not coordinate, as much as we can coordinate it may be at the lower level. The community is limited to that, even though in fact, for example, in the health center, there is an elderly program from the BKKBN and an elderly program from the health office. |  |
|  |  | A (I23) | Elderly schools are more productive not only once a month, because I like to go for a walk |  |
|  |  | H (I24) | The elderly posyandu program is further improved, so that the elderly are not bored anyway |  |
|  | Biringkanaya | AS (I25) | The program continues. For example, the craft was proposed and this is only in the form of an elderly school, but while it is being worked on because it is still running for 2 months and we have joined the choir as well and we won 3rd place. And the competition is at the RW level, so it's a gathering" happy because they exchange stories. |  |
|  |  | A (I26) | The hope is that there will be special activities for the elderly and this has now been running for about 2 months, this elderly program hopes that the government will provide suppositivity and support so |  |
|  |  | F (I27) | I hope that the elderly will be taken care of in terms of their health because on average" their needs are often absent, and the second is busy with various activities, for example dictated various activities that they are interested in doing, for example, skills, crafts. But thankfully there are elderly schools, at least they have a busy time for the elderly girls, if the elderly guys are difficult to mi because of their world |  |
|  | Mariso | I (I28) | Yes, that's how it is. How can I be healed. I also never participated in gymnastics, just walking in front of the house |  |
|  |  | J (I29) | If I don't know if it's because I'm lazy to do something like that, I don't know. |  |
|  |  | DN (I30) | If I don't know if it's because I'm lazy to do something like that, I don't know. |  |
|  | Rappocini | H.E (I31) | If the government has a free food program, there should be a guarantee for the elderly as well. If it is abroad, there is it. Indonesia may be like that later, hopefully. Paying attention to the well-being of the elderly |  |
|  |  | R (I32) | if possible, the elderly can also get help, such as PMT at least milk so that the elderly can stay strong and always participate in activities. |  |
|  |  | AA (I33) | For hope, of course, it's a skill so that we also have a lot of activities, yes, it's the same as we usually hold social gatherings at the health center, so after social gatherings we have recreation. |  |
|  | Sangkkarang | MK (I34) | I get funds from the project around 250k if, for example, the elderly program is improved, it means fostering the elderly anyway. And many elderly programs |  |
|  |  | M (I35) | Always healthy, and the posyannya is good for checking on us |  |
|  |  | H (I36) | The hope is that hopefully elderly skills activities can be held here, because it's good for the family economy as well |  |
|  | Tamalate | M (I37) | For example, if the posyandu is repaired, we will be more happy, because if there is no posyandu, it is not good, we will be thrown here. In the past, when it was good to have a posyandu here, it was good that I had a child from the first to the second and my grandson again, good. |  |
|  |  |  | S (I38) | The hope is that hopefully there will be activities that can bring all the elderly together so that they are healthy and not just sitting at home, but that's usually if their elderly are no longer strong, right, only if they can still hold it, because it is also good for the welfare of the elderly |  |
|  |  | M (I39) | More attention is paid to the elderly, facilitated by those who do not have KIS and what assistance is provided and also seen as homecare as well |  |
|  | São Paulo | J (I40) | The hope is that if there can be skills in the school for the elderly, so that we can also produce |  |
|  |  | I (I41) | I want to be cared for because it's not said where because we are old so we need to be guided so that we can succeed and have good health. It is also possible that there are those who have guarantees and some who do not, so I mean that the government is looking at who has not received such assistance. I have never received such help and attention from the elderly. |  |
|  |  | R (I42) | The hope, as I have said, is that it is good that there are skills that can produce works |  |
|  | End of View | MM (I43) | Increase the number of cadres and invite each other, for example, they do not want to recite with us |  |
|  |  | M (I44) | for hope there is actually no yes. |  |
|  |  | HW (I45) | Now this is the welfare of the first elderly for assistance from the government because there are indeed elderly people in one family who are all elderly and none of them get assistance from the government at all. Usually I have conveyed it to the village but there is no reciprocity from them. In terms of cadres, thank God it is enough. Now for this focus, they are usually just names. And I want everyone to move and I happen to be the head of the posyan, there is no need for many people if it's just a name, it's better to have a little if everything works. |  |
| 12. | What is the biggest challenge in ensuring that the needs of the elderly can be met in a sustainable manner? | Mango | Hj.A (I1) | Challenges Are Not Present |  |
|  |  | JS (I2) | The challenge is why we always prioritize cleanliness, but this is the government, it is quite rare to take garbage, garbage can be very smelly and accumulate if it is not taken, so it can disturb the environment. | 1. Barriers to Facilities and Funds :(I10), (I21), (I26), (I36), (I39) 2. Expected program improvements: (I15), (I19), (I32), (I34), (I41) 3. Physical condition : (I27), (I28), (I35) |
|  |  | W(I3) | There are no significant challenges, as long as there is cooperation and concern from all parties |  |
|  | Squirt | NS (I4) | For example, each family is not supportive. Frankly, here there has been a message to the elderly sister "bring your grandmother" no one cares, indeed from the main family. Indeed, the main family factor is for example if the neighbor supports but if the family does not support it, it can't either. So the mindset that must be fixed |  |
|  |  | AS (I5) | The challenge is a factor, sometimes we are a transportation factor that should support us to go to the places that our regeneration expects to be in that place. Some elderly need invitations, help from people |  |
|  |  | S (I6) | That was earlier. If the elderly have already taken that step, they must be dying if they are not delivered. Mobilization. So it might be good if it's close. If those who are still active, still know, grab-grab, maybe it's safe. But if it doesn't, it's a pity, it's only when the activity is far away. So it's good that the elderly, he's the one who comes. So, for example, in each village, the nearest sub-district from there to this is Javanese. Karang Anyer crossed. So see again the close slap of the cake. So let it be the morning of the activity. The elderly can walk in the morning. Finish, not until noon. They can see the streets. There was indeed a road for the elderly yesterday. |  |
|  | Tamalanrea | A (I7) | If the challenge is because what is expected is only the posyandu that is here, the other challenge is that we go to the health center if we get sick, it is the health center, right, if the others do not exist |  |
|  |  | AS (I8) | All needs have been fulfilled, if there is no current it may need to be improved in the future |  |
|  |  | S (I9) | The challenge is when the elderly cannot come for an examination because there is no one to deliver or is not strong enough to go to the posyandu. |  |
|  | Bontoala | H(I10) | There is also none, if you do gymnastics, if you are alone and often jog here. Indeed, there are no joint gymnastics activities and indeed a gymnastics program for the elderly must be developed, it only exists at the health center for elderly gymnastics if the environment here does not exist. Here too, if you want to hold it is a bit heavy and the market and aisle here are small. |  |
|  |  | R (I11) | There are no challenges. |  |
|  |  | SD (I12) | So, Alhamdulillah, every time there is a good activity at school, there is a sudden activity, Alhamdulillah. Access there is on average close, not far if you go to a distant place means the same as all one class go, so prepare a car. But if it's usually in the PPKK building next to the streets there are no obstacles |  |
|  | The End of the Ground | H (I13) | Hopefully everyone is healthy, do gymnastics often and the same elderly gather, walk". If there are activities for the elderly to participate |  |
|  |  | B (I14) | None |  |
|  |  | N (I15) | I have a lot of challenges to guard in Musrembang, but it has not been realized until now. As far as the arrangements, not all of them can be covered, right? But I want there to be activities for the elderly on a continuous basis |  |
|  | Scared | Hj.SR (I16) | The facilities are good, and the nurses are good and there used to be nephews there. And when my father was sick, I took the medicine |  |
|  |  | K (I17) | No, because we are also visited from the center, directly visited, there are no obstacles or challenges |  |
|  |  | AR (I18) | That may be the big obstacle. how yesterday I happened to talk to the people of the Health Center, I said, "If this is not the case, suppose there is no this, suppose I want to know if there is an nda or not?" Because all this time what we have been using is the neighbor's speaker, right? Because the speaker at home is damaged, we use it. Damaged. So I'm also sorry it's not good, anyway, keep using it? And if a neighbor says, "No, that's the most important thing." Yes, I would like to, but I don't think so. |  |
|  | Wajo | H.B (I19) | If I am matakuji who is on the right. So maybe a new program such as cataract examination will be made |  |
|  |  |  | Hj. BS(I20) | The challenge is yes, it's still as I said, the challenge here is not met because there are rarely any activities |  |
|  |  | Hj. H (I21) | The main challenge is due to limited funds, manpower, and program sustainability. Many activities do not run consistently due to limited resources, while the needs of the elderly continue to increase |  |
|  | Stem | F (I22) | If the distance is not, it is unclear if they do not come because they are sick or go to the village or there is no one to deliver them because they have to be accompanied by their families. So if they have been examined, we will ask them to do gymnastics, because this is coupled with the examination of those who can participate in gymnastics and those who cannot sit and whose families come we provide counseling |  |
|  |  | A (I23) | There are no challenges, because if I get sick, I immediately want to go to the clinic/health center |  |
|  |  | H (I24) | There is no challenge because everyone supports |  |
|  | Biringkanaya | AS (I25) | Sometimes if there is an obstacle I don't go, if I do gymnastics I never go alpha |  |
|  |  | A (I26) | The challenge is not too striking, if they are told to gather, they do it, only the obstacle is 1 inadequate facility in an elderly school, such as if there are also a lack of chairs and blackboards. |  |
|  |  | F (I27) | For example, what makes ki hampered is flat" like "why don't you go to an elderly school" you don't follow the pain in my knees, maybe it's from health and physical factors, so I can't go" because of my leg pain. Right, "my elderly school is close to all, even if there is outside the RW from the RW of the neighboring RW, they are usually escorted just that, if people" here the obstacle is the first health, the second is their busyness they live with their children are usually told to take care of their grandchildren "they want to go but there is no take care of my grandchildren" so that's how to take care of their grandchildren. The majority of elderly women are only 2/3 of men. Why are there fewer elderly men? And I also see that where the "activity is male" is less for those who participate in activities like that. The term is like this, elderly men "have their own world for you" for example, get together to play dominoes instead of hanging out with your mother" |  |
|  | Mariso | I (I28) | from economic factors |  |
|  |  | J (I29) | I don't know |  |
|  |  | DN (I30) | The challenge is actually difficult because here the average person needs social assistance and the direction is also different if we want to. |  |
|  | Rappocini | H.E (I31) | There is no yes, the biggest challenge. So far, I've been comfortable. The biggest challenge is how to deal with it. |  |
|  |  | R (I32) | I think the government must be more intensive in providing assistance, because the elderly need this, not just toddlers, so that the elderly also have their own abilities. |  |
|  |  | AA (I33) | Challenges don't exist in my opinion |  |
|  | Sangkkarang | MK (I34) | Must ensure that the elderly are adequate and guaranteed for their regular check-ups |  |
|  |  | M (I35) | Ituji if I usually go for regular check-ups if the blood pressure is high, they do not provide what medicine to take |  |
|  |  | H (I36) | The biggest challenge is of course the problem of funds, because there is still a lack here. |  |
|  | Tamalate | M (I37) | Yes, it is getting better and better. |  |
|  |  | S (I38) | I don't know if that is the biggest challenge |  |
|  |  | M (I39) | Maybe there are constraints in terms of funds and facilities at the posyandu because the examination is also somewhat lacking, so this elderly need a complete examination |  |
|  | São Paulo | J (I40) | The challenge is non-existent. |  |
|  |  | I (I41) | Look, oh it's the second day at the Barayya brick health center, right, we have an examination there, such as blood pressure checks, blood sugar, etc., all of which are good anyway every month so that there are check-ups, the elderly, there must be needs and must be considered. |  |
|  |  | R (I42) | There is no challenge in my opinion, because if there is a shortcoming like that, we usually immediately write and talk about it to other cadres. |  |
|  |  | End of View | MM (I43) | Challenges Are Not Present |  |
|  |  |  | M (I44) | challenge so I don't know I didn't go along like that. |  |
|  |  |  | HW (I45) | If others are normal, no one can get up because of health constraints and cannot walk and stand |  |
| 13. | According to you, how can you overcome the limitations of resources (manpower, funds, facilities) in the elderly program? | Mango | Hj.A (I1) | Involve cadres and must focus on the elderly |  |
|  | JS (I2) | 12. To overcome the fact that it is really good, you can directly tell the government or related parties so that in terms of funds and facilities it can be held immediately, hopefully there will be new procurement, so that the community is happy with the solution of this matter | 1. Collaborations :(I5), (I11), (I21), (I33), (I36), (I42) 2. Government program funds : I6), (I7), (I18), (I19), (I21), (I31), (I32), (I34), (I35), (I37) 3. Cadre involvement:I13), (I19), (I25), (I27), (I40), (I41) 4. Optimization of cadres :(I4), (I12), (I26), (I28), (I29), (I38), (I42) |
|  | W(I3) | By involving cadres and staying focused on the needs of the elderly so that the program runs effectively. |  |
|  | Squirt | NS (I4) | Indeed, from the beginning we cannot be instantaneous, it is not as easy as turning the palm of your hand. Thank God I can prepare the facilities. So if you go to an elderly school, the elderly are told to sit on the floor, so I said "I can't let the elderly sit on the floor" so I took a chair, I held it but the transportation took it from us. And Mrs. Aji was ready for that and I took her chair at the mosque. Incidentally, an elderly student of 28 from Mamajang District |  |
|  |  | AS (I5) | The way we overcome it is by doing cooperation, mutual cooperation so that the heavy feels easy for us to do, that's all we hope |  |
|  |  | S (I6) | Alhamdulillah. The only thing that is a big challenge is that the budget is also one of them. Yes, it is. It's just like that. Is this the budget for the elderly school from the government or self-help? Government. Oh the government. Yes. But limited too. Not all. So like here yesterday there are some who want to register. It's just that there is a quota. In this sub-district, there are nine. That's nine RWs. Taken to another village, gather in one place. So that everything that includes it is listed. Like this, if there are a lot of elderly people. The 26th is here. Putin is the ILP to be implemented. There are in the Elderly. The elderly alone are more than toddlers. Yes, right? |  |
|  | Tamalanrea | A (I7) | If the problem of the program depends on government support, if such a problem depends on the government, because in this environment it is impossible for residents to collect money about health, but if the government supports it, it is better if there is assistance from the government |  |
|  |  | AS (I8) | We are facing how we manage our finances in the elderly, retirement, seeing this financial condition improve, yes, it's smart" is how we manage finances, from health facilities that are more adequate and all complete and complete examinations |  |
|  |  | S (I9) | if the posyandu is complete, if the funds are assistance from RW they are like MBTs for children under five, and also FKM children also always come like street vendors here |  |
|  | Bontoala | H(I10) | I never participated in that, if I didn't follow the elderly program and indeed I just entered |  |
|  |  | R (I11) | Yesterday we had a sponsorship from the governor so as long as we want to continue this school, the elderly, the elderly are always the ones who contribute like 5 thousand, and the facilities are complete here. |  |
|  |  | SD (I12) | The facilities are sufficient, but there are still incomplete inspections, so maybe the government will immediately complete the facilities and give funds to elderly schools |  |
|  | The End of the Ground | H (I13) | The facilities are all good, in collaboration with BKKBN for tasks, such as the elderly who are not present, cadres who come to their elderly homes. I have been in the elderly school for a long time and my son happens to be a cadre. And I used to be a cadre too, but the age factor is also old and I look for a young one" so I am no longer there. And now I work here as an assistant" work here |  |
|  |  | B (I14) | Good, usually sometimes" go to treatment, because coughing 2/3 times comes back cough is my disease |  |
|  |  | N (I15) | So if I rely more on business results here, I will spend a few percent, so if he is enough I gather for recreation, I bring recreation, many volunteers from group members |  |
|  | Scared | Hj.SR (I16) | The cadres are good, if from me it is safe and better to stay at home |  |
|  |  | K (I17) | Oh, if the resources I think have been good from the beginning. I have lived here for quite a long time. It's been more than 34 years, right? So I see from the beginning that I stayed until now, but thank God it's good |  |
|  |  | AR (I18) | Yes, how do you want to regulate it if there is none? Wow, that's tough too. That's also the case, I used to think, "Oh God, hopefully there are great people who want to help us, continue like this." Because of this program, the program is Karuwisi Village, he means |  |
|  | Wajo | H.B (I19) | There are no funds from the government, the facilities are adequate and the cadres often come to my house if I don't come to the posyandu for a health check-up |  |
|  |  | Hj. BS(I20) | Because I don't go here very often, so I don't know, I just go to the posyandu. |  |
|  |  | Hj. H (I21) | The solution may be to strengthen collaboration, for example collaborating with the PKK, local communities, and utilizing cadres as facilitators. The government is also expected to be more serious in providing special funds for elderly activities so that they do not depend on the personal initiative of cadres |  |
|  | Stem | F (I22) | The socialization is still lacking, for example, from the social service of the elderly program that helps the elderly, the socialization is only limited to the spread of the cadres, even with limitations. The program we socialize is also still lacking because it is more or less like that, there is no collaboration and also the budget is very limited. So yes, it also includes helping the movement of friends' steps" in the field |  |
|  |  | A (I23) | I don't know |  |
|  |  | H (I24) | In terms of funds, it seems safe, and the facilities at the posyandu also seem to be complete |  |
|  | Biringkanaya | AS (I25) | From the limited resources, I don't think it exists because the cadres are very active. And they are replaced by those who check for the elderly and pregnant women. |  |
|  |  | A (I26) | We sometimes get together, like this, there is a church and we usually borrow chairs if it doesn't coincide with the day. Including funding, there is also a lack of funds for this elderly school that does not exist specifically from the government because it has only been running for 2 months. Isn't there a schedule at the posyandu every 12th. The examination of toddlers for elderly pregnant women is still limited only to tension and blood sugar and that is one of the limitations because the examination is incomplete |  |
|  |  | F (I27) | If I could, I would feel like we are a cadre of babies under five and older again, after all, I would actually be a cadre of babies under five separated from elderly cadres. So that they can focus, just imagine it during the posyandupi, now I can tell you because my patients are babies under five and not yet elderly, while we cadres only have 5 posyandu tables, there are 4 service desks, not to mention if there is no one to accompany the elderly. So sometimes it's a pity, I personally never sit down. And finally, it will be difficult to make a new report, the obstacle is that health workers are also lacking because the one who went down was one. And here every day the posyandu so if we want to separate the days like I am a toddler 12 posyandu wants to move the date while on the stairs there is also a service in this place. If I want the cadres to be separate and always on standby. Posyandu here is per RW |  |
|  | Mariso | I (I28) | The facilities at the health center are supportive and the doctors are also good. The nurses are also good and the way they are served is also good. It's not the same as it used to be, now it's good. But the examination is not complete, only uric acid and brown sugar checks. |  |
|  |  | J (I29) | I don't know how to overcome it, but in terms of manpower and complete facilities at the health center or at the posyandu |  |
|  |  | DN (I30) | If I actually want to overcome this, we need to talk about this with the person who is responsible because we see that the elderly need something that they should get |  |
|  | Rappocini | H.E (I31) | If people are mediocre. Now what else do you want to make? The most important role of the government is if the government has a program for the elderly. If there is none, what do you want to say. What is that? If from the facilities at his posyan, it is also complete, complete according to he has existing maintenance equipment. We can't force it. Yes, so it comes down to the government again. Depending on... Which the government gave as well. The government has a program, which means that if it has such a program, it is just like that |  |
|  |  | R (I32) | The government should have come down to help with this, indeed we have never written to it, we just told the health center to say if there was also no assistance for the elderly, but they said there was no assistance for the elderly either. |  |
|  |  | AA (I33) | If I want to overcome limitations, it's good if we help too, like we volunteer or collect money one by one. |  |
|  | Sangkkarang | MK (I34) | Yes, with the government to provide assistance |  |
|  |  | M (I35) | Yes, with assistance from the government |  |
|  |  | H (I36) | The way to overcome this is of course voluntary, yes, when I was a cadre, we volunteered for the fund, we also volunteered to see this if it was still lacking in the elderly program |  |
|  | Tamalate | M (I37) | No government funds have ever been channeled. If the examination of the posyandu is good and the service is good and the cadres are good, if the toddler is good for the service and pay attention. For example, if you have a toddler food out there, take it and never be rude to a toddler |  |
|  |  | S (I38) | I also don't know how to deal with it, but here it's usually incomplete, I checked at the posyandu only the tension and blood sugar |  |
|  |  | M (I39) | It should be focused on one cadre for the elderly and etc. How can you say that you are invited to competitions and recreation so that they can also refrain as well. |  |
|  | São Paulo | J (I40) | Usually, then immediately tell the cadres if there are shortcomings so that later they will be facilitated if there is indeed something missing. |  |
|  |  | I (I41) | If the cadres are good, the facilities and services are also good and we are also given what kind of rice is given every meeting, like consumption like that and everything is fulfilled |  |
|  |  | R (I42) | Well, if there are indeed such shortcomings, it's good if we work together to collect goods, if indeed there are no facilities. |  |
|  | The End of Pandan | MM (I43) | If there is enough in the posyandu, the examination is also there. For example, two weeks is a child's scale", next month again the elderly, because it is usually full of rooms and there is indeed a schedule for each of them. |  |
|  | M (I44) | If so, you can immediately report if it is indeed in terms of funds and facilities lacking so that the other party can help/overcome it |  |
|  | HW (I45) | By involving the participation of the community and volunteers to help services for the elderly, |  |
